# Supplementary material for: The Effect of Dietary Protein Concentration on the Fecal Microbiome and Serum Concentrations of Gut-Derived Uremic Toxins in Healthy Adult Cats
Source: MDPI journal article supplement (doi:10.3390/vetsci10080497), 2023-08-02
Supplement: s1 [file s1]

**Table S1.** List of taxa at the OTU level that were significantly ( $P < 0.05$ ) different between healthy cats fed either a high protein diet or low protein diet for 12 weeks.

| Taxon                                                                                                                                                                         | Adjusted P-value |
|-------------------------------------------------------------------------------------------------------------------------------------------------------------------------------|------------------|
| k__Bacteria;p__Actinobacteria;c__Actinobacteria;o__Bifidobacteriales;f__Bifidobacteriaceae;g__Bifidobacterium;s__Bifidobacterium_longum;t__Bifidobacterium_longum_JCM_1217    | 0.007038         |
| k__Bacteria;p__Actinobacteria;c__Actinobacteria;o__Bifidobacteriales;f__Bifidobacteriaceae;g__Bifidobacterium;s__Bifidobacterium_longum;t__Bifidobacterium_longum_BT1         | 0.007038         |
| k__Bacteria;p__Actinobacteria;c__Actinobacteria;o__Bifidobacteriales;f__Bifidobacteriaceae;g__Bifidobacterium;s__Bifidobacterium_longum;t__Other                              | 0.007061         |
| k__Bacteria;p__Actinobacteria;c__Actinobacteria;o__Bifidobacteriales;f__Bifidobacteriaceae;g__Bifidobacterium;s__Bifidobacterium_longum;t__Bifidobacterium_longum_35624       | 0.00707          |
| k__Bacteria;p__Actinobacteria;c__Actinobacteria;o__Bifidobacteriales;f__Bifidobacteriaceae;g__Bifidobacterium;s__Bifidobacterium_longum;t__Bifidobacterium_longum_CECT_7210   | 0.007165         |
| k__Bacteria;p__Actinobacteria;c__Actinobacteria;o__Bifidobacteriales;f__Bifidobacteriaceae;g__Bifidobacterium;s__Bifidobacterium_reuteri;t__Bifidobacterium_reuteri_DSM_23975 | 0.007184         |
| k__Bacteria;p__Actinobacteria;c__Actinobacteria;o__Bifidobacteriales;f__Bifidobacteriaceae;g__Bifidobacterium;s__Bifidobacterium_longum;t__Bifidobacterium_longum_NCIMB8809   | 0.007229         |
| k__Bacteria;p__Actinobacteria;c__Actinobacteria;o__Bifidobacteriales;f__Bifidobacteriaceae;g__Bifidobacterium;s__Bifidobacterium_longum;t__Bifidobacterium_longum_NCC2705     | 0.007248         |
| k__Bacteria;p__Actinobacteria;c__Actinobacteria;o__Bifidobacteriales;f__Bifidobacteriaceae;g__Bifidobacterium;s__Bifidobacterium_breve;t__Other                               | 0.00733          |
| k__Bacteria;p__Actinobacteria;c__Actinobacteria;o__Bifidobacteriales;f__Bifidobacteriaceae;g__Bifidobacterium;s__Bifidobacterium_longum;t__Bifidobacterium_longum_KACC_91563  | 0.007777         |
| k__Bacteria;p__Actinobacteria;c__Actinobacteria;o__Bifidobacteriales;f__Bifidobacteriaceae;g__Bifidobacterium;s__Bifidobacterium_longum;t__Bifidobacterium_longum_CCUG30698   | 0.008325         |
| k__Bacteria;p__Actinobacteria;c__Actinobacteria;o__Bifidobacteriales;f__Bifidobacteriaceae;g__Bifidobacterium;s__Bifidobacterium_longum;t__Bifidobacterium_longum_DJO10A      | 0.008809         |
| k__Bacteria;p__Actinobacteria;c__Actinobacteria;o__Bifidobacteriales;f__Bifidobacteriaceae;g__Bifidobacterium;s__Bifidobacterium_longum;t__Bifidobacterium_longum_GT15        | 0.008943         |
| k__Bacteria;p__Actinobacteria;c__Actinobacteria;o__Bifidobacteriales;f__Bifidobacteriaceae;g__Bifidobacterium;s__Bifidobacterium_breve;t__Bifidobacterium_breve_NRBB57        | 0.008949         |

|                                                                                                                                                                                                     |          |
|-----------------------------------------------------------------------------------------------------------------------------------------------------------------------------------------------------|----------|
| k__Bacteria;p__Actinobacteria;c__Actinobacteria;o__Bifidobacteriales;f__Bifidobacteriaceae;g__Bifidobacterium;s__Bifido<br>bacterium_breve;t__Bifidobacterium_breve_DRBB26                          | 0.009604 |
| k__Bacteria;p__Actinobacteria;c__Actinobacteria;o__Bifidobacteriales;f__Bifidobacteriaceae;g__Bifidobacterium;s__Bifido<br>bacterium_breve;t__Bifidobacterium_breve_NRBB09                          | 0.009921 |
| k__Bacteria;p__Actinobacteria;c__Actinobacteria;o__Bifidobacteriales;f__Bifidobacteriaceae;g__Bifidobacterium;s__Bifido<br>bacterium_sp._12_1_47BFAA;t__Bifidobacterium_sp._12_1_47BFAA_12_1_47BFAA | 0.010235 |
| k__Bacteria;p__Actinobacteria;c__Actinobacteria;o__Bifidobacteriales;f__Bifidobacteriaceae;g__Bifidobacterium;s__Bifido<br>bacterium_breve;t__Bifidobacterium_breve_JCM_7019                        | 0.011109 |
| k__Bacteria;p__Actinobacteria;c__Actinobacteria;o__Bifidobacteriales;f__Bifidobacteriaceae;g__Bifidobacterium;s__Bifido<br>bacterium_breve;t__Bifidobacterium_breve_12L                             | 0.011278 |
| k__Bacteria;p__Actinobacteria;c__Actinobacteria;o__Bifidobacteriales;f__Bifidobacteriaceae;g__Bifidobacterium;s__Bifido<br>bacterium_saguini;t__Bifidobacterium_saguini_DSM_23967                   | 0.011325 |
| k__Bacteria;p__Actinobacteria;c__Actinobacteria;o__Bifidobacteriales;f__Bifidobacteriaceae;g__Bifidobacterium;s__Bifido<br>bacterium_bifidum;t__Other                                               | 0.013131 |
| k__Bacteria;p__Actinobacteria;c__Actinobacteria;o__Bifidobacteriales;f__Bifidobacteriaceae;g__Bifidobacterium;s__Bifido<br>bacterium_breve;t__Bifidobacterium_breve_S27                             | 0.01343  |
| k__Bacteria;p__Actinobacteria;c__Actinobacteria;o__Bifidobacteriales;f__Bifidobacteriaceae;g__Bifidobacterium;s__Bifido<br>bacterium_longum;t__Bifidobacterium_longum_BG7                           | 0.013471 |
| k__Bacteria;p__Actinobacteria;c__Actinobacteria;o__Bifidobacteriales;f__Bifidobacteriaceae;g__Bifidobacterium;s__Bifido<br>bacterium_breve;t__Bifidobacterium_breve_NRBB02                          | 0.014306 |
| k__Bacteria;p__Actinobacteria;c__Actinobacteria;o__Bifidobacteriales;f__Bifidobacteriaceae;g__Bifidobacterium;s__Other;<br>t__Other                                                                 | 0.014364 |
| k__Bacteria;p__Actinobacteria;c__Actinobacteria;o__Bifidobacteriales;f__Bifidobacteriaceae;g__Bifidobacterium;s__Bifido<br>bacterium_thermophilum;t__Bifidobacterium_thermophilum_RBL67             | 0.01592  |
| k__Bacteria;p__Actinobacteria;c__Actinobacteria;o__Bifidobacteriales;f__Bifidobacteriaceae;g__Bifidobacterium;s__Bifido<br>bacterium_longum;t__Bifidobacterium_longum_F8                            | 0.016403 |
| k__Bacteria;p__Actinobacteria;c__Actinobacteria;o__Bifidobacteriales;f__Bifidobacteriaceae;g__Bifidobacterium;s__Bifido<br>bacterium_breve;t__Bifidobacterium_breve_LMC520                          | 0.016663 |
| k__Bacteria;p__Actinobacteria;c__Actinobacteria;o__Bifidobacteriales;f__Bifidobacteriaceae;g__Bifidobacterium;s__Bifido<br>bacterium_longum;t__Bifidobacterium_longum_105-A                         | 0.016826 |
| k__Bacteria;p__Actinobacteria;c__Actinobacteria;o__Bifidobacteriales;f__Bifidobacteriaceae;g__Bifidobacterium;s__Bifido<br>bacterium_breve;t__Bifidobacterium_breve_NRBB11                          | 0.017975 |
| k__Bacteria;p__Actinobacteria;c__Actinobacteria;o__Bifidobacteriales;f__Bifidobacteriaceae;g__Bifidobacterium;s__Bifido<br>bacterium_longum;t__Bifidobacterium_longum_157F                          | 0.017996 |

|                                                                                                                                                                                             |          |
|---------------------------------------------------------------------------------------------------------------------------------------------------------------------------------------------|----------|
| k__Bacteria;p__Firmicutes;c__Other;o__Other;f__Other;g__Other;s__Other;t__Other                                                                                                             | 0.018374 |
| k__Bacteria;p__Actinobacteria;c__Actinobacteria;o__Bifidobacteriales;f__Bifidobacteriaceae;g__Bifidobacterium;s__Bifidobacterium_longum;t__Bifidobacterium_longum_BXY01                     | 0.018808 |
| k__Bacteria;p__Actinobacteria;c__Actinobacteria;o__Bifidobacteriales;f__Bifidobacteriaceae;g__Bifidobacterium;s__Bifidobacterium_kashiwanohense;t__Other                                    | 0.019349 |
| k__Bacteria;p__Actinobacteria;c__Actinobacteria;o__Bifidobacteriales;f__Bifidobacteriaceae;g__Bifidobacterium;s__Bifidobacterium_bifidum;t__Bifidobacterium_bifidum_NCIMB_41171             | 0.019706 |
| k__Bacteria;p__Actinobacteria;c__Actinobacteria;o__Bifidobacteriales;f__Bifidobacteriaceae;g__Bifidobacterium;s__Bifidobacterium_breve;t__Bifidobacterium_breve_UCC2003                     | 0.021219 |
| k__Bacteria;p__Actinobacteria;c__Actinobacteria;o__Bifidobacteriales;f__Bifidobacteriaceae;g__Bifidobacterium;s__Bifidobacterium_kashiwanohense;t__Bifidobacterium_kashiwanohense_PV20-2    | 0.021782 |
| k__Bacteria;p__Actinobacteria;c__Actinobacteria;o__Bifidobacteriales;f__Bifidobacteriaceae;g__Bifidobacterium;s__Bifidobacterium_kashiwanohense;t__Bifidobacterium_kashiwanohense_JCM_15439 | 0.022786 |
| k__Bacteria;p__Actinobacteria;c__Actinobacteria;o__Bifidobacteriales;f__Bifidobacteriaceae;g__Bifidobacterium;s__Bifidobacterium_bifidum;t__Bifidobacterium_bifidum_PRI_1                   | 0.025354 |
| k__Bacteria;p__Firmicutes;c__Clostridia;o__Clostridiales;f__Ruminococcaceae;g__Faecalibacterium;s__Faecalibacterium_prausnitzii;t__Faecalibacterium_prausnitzii_2789STDY5834970             | 0.026432 |
| k__Bacteria;p__Firmicutes;c__Erysipelotrichia;o__Erysipelotrichales;f__Erysipelotrichaceae;g__Faecalitalea;s__Faecalitalea_cylindroides;t__Faecalitalea_cylindroides_T2-87                  | 0.029521 |
| k__Bacteria;p__Actinobacteria;c__Actinobacteria;o__Bifidobacteriales;f__Bifidobacteriaceae;g__Bifidobacterium;s__Bifidobacterium_longum;t__Bifidobacterium_longum_AH1206                    | 0.029735 |
| k__Bacteria;p__Actinobacteria;c__Actinobacteria;o__Bifidobacteriales;f__Bifidobacteriaceae;g__Bifidobacterium;s__Bifidobacterium_bifidum;t__Bifidobacterium_bifidum_2789STDY5608877         | 0.030296 |
| k__Bacteria;p__Firmicutes;c__Negativicutes;o__Veillonellales;f__Veillonellaceae;g__Megasphaera;s__Megasphaera_elsdenii;t__Megasphaera_elsdenii_T81                                          | 0.030789 |
| k__Bacteria;p__Actinobacteria;c__Actinobacteria;o__Bifidobacteriales;f__Bifidobacteriaceae;g__Bifidobacterium;s__Bifidobacterium_bifidum;t__Bifidobacterium_bifidum_BGN4                    | 0.032044 |
| k__Bacteria;p__Firmicutes;c__Clostridia;o__Clostridiales;f__Ruminococcaceae;g__Faecalibacterium;s__Faecalibacterium_prausnitzii;t__Other                                                    | 0.033175 |
| k__Bacteria;p__Actinobacteria;c__Actinobacteria;o__Bifidobacteriales;f__Bifidobacteriaceae;g__Bifidobacterium;s__Bifidobacterium_breve;t__Bifidobacterium_breve_689b                        | 0.034435 |
| k__Bacteria;p__Firmicutes;c__Clostridia;o__Clostridiales;f__Other;g__Intestinimonas;s__Intestinimonas_massiliensis;t__Intestinimonas_massiliensis_GD2                                       | 0.039188 |

|                                                                                                                                                                                                         |          |
|---------------------------------------------------------------------------------------------------------------------------------------------------------------------------------------------------------|----------|
| k__Bacteria;p__Firmicutes;c__Clostridia;o__Clostridiales;f__Ruminococcaceae;g__Agathobaculum;s__Agathobaculum_des molans;t__Agathobaculum_desmolans_ATCC_43058                                          | 0.040182 |
| k__Bacteria;p__Actinobacteria;c__Actinobacteria;o__Bifidobacteriales;f__Bifidobacteriaceae;g__Bifidobacterium;s__Bifido bacterium_adolescentis;t__Bifidobacterium_adolescentis_2789STDY5834850          | 0.040415 |
| k__Bacteria;p__Actinobacteria;c__Actinobacteria;o__Bifidobacteriales;f__Bifidobacteriaceae;g__Bifidobacterium;s__Bifido bacterium_bifidum;t__Bifidobacterium_bifidum_BF3                                | 0.040705 |
| k__Bacteria;p__Actinobacteria;c__Actinobacteria;o__Bifidobacteriales;f__Bifidobacteriaceae;g__Bifidobacterium;s__Bifido bacterium_breve;t__Bifidobacterium_breve_JCM_7017                               | 0.04097  |
| k__Bacteria;p__Firmicutes;c__Clostridia;o__Clostridiales;f__Lachnospiraceae;g__Roseburia;s__Roseburia_inulinivorans;t__ Other                                                                           | 0.042152 |
| k__Bacteria;p__Firmicutes;c__Clostridia;o__Clostridiales;f__Lachnospiraceae;g__Blautia;s__Blautia_sp._Marseille- P3087;t__Blautia_sp._Marseille-P3087_Marseille-P3087                                   | 0.043359 |
| k__Bacteria;p__Actinobacteria;c__Actinobacteria;o__Bifidobacteriales;f__Bifidobacteriaceae;g__Bifidobacterium;s__Bifido bacterium_adolescentis;t__Bifidobacterium_adolescentis_ATCC_15703               | 0.043801 |
| k__Bacteria;p__Firmicutes;c__Clostridia;o__Clostridiales;f__Ruminococcaceae;g__Ruminiclostridium;s__[Clostridium]_lept um;t__[Clostridium]_leptum_DSM_753                                               | 0.04411  |
| k__Bacteria;p__Firmicutes;c__Negativicutes;o__Acidaminococcales;f__Acidaminococcaceae;g__Phascolarctobacterium;s__ Phascolarctobacterium_succinatutens;t__Phascolarctobacterium_succinatutens_YIT_12067 | 0.044675 |
| k__Bacteria;p__Firmicutes;c__Clostridia;o__Clostridiales;f__Eubacteriaceae;g__Eubacterium;s__Eubacterium_sp._3_1_31;t__ Eubacterium_sp._3_1_31_3_1_31                                                   | 0.045296 |
| k__Bacteria;p__Actinobacteria;c__Actinobacteria;o__Bifidobacteriales;f__Bifidobacteriaceae;g__Bifidobacterium;s__Bifido bacterium_breve;t__Bifidobacterium_breve_NCFB_2258                              | 0.046181 |
| k__Bacteria;p__Firmicutes;c__Clostridia;o__Clostridiales;f__Lachnospiraceae;g__Lachnoclostridium;s__Other;t__Other                                                                                      | 0.046353 |
| k__Bacteria;p__Firmicutes;c__Erysipelotrichia;o__Erysipelotrichales;f__Erysipelotrichaceae;g__Merdibacter;s__Merdibacte r_massiliensis;t__Merdibacter_massiliensis_Marseille-P3254                      | 0.047958 |
| k__Bacteria;p__Firmicutes;c__Clostridia;o__Clostridiales;f__Ruminococcaceae;g__Gemmiger;s__Gemmiger_formicilis;t__G emmiger_formicilis_ATCC_27749                                                       | 0.048325 |
| k__Bacteria;p__Actinobacteria;c__Actinobacteria;o__Bifidobacteriales;f__Bifidobacteriaceae;g__Bifidobacterium;s__Bifido bacterium_sp._TRE_D;t__Bifidobacterium_sp._TRE_D_TRE_D                          | 0.048713 |
